# Supplementary material for: Accuracy of syndrome definitions based on diagnoses in physician claims
Source: BMC Public Health. 2011 Jan 7;11:17. doi: 10.1186/1471-2458-11-17 (PMC3025839; doi:10.1186/1471-2458-11-17)
Supplement: Additional file 1 — Positive predictive value of individual ICD-9 codes within each syndrome case definition. For all 12 syndrome case definitions investigated, the positive predictive value of diagnoses in physician claims is provided for each individual ICD-9 code. [file 1471-2458-11-17-S1.XLSX]

## Sheet: CDC Fever
FEVER SYNDROME, CDC-DoD definition
ICD-9 code in claims*	Text label for ICD-9 code	No. visits in claims**	No. visits in verified claims***	PPV	95% CI
					Lower limit	Upper limit
2	TYPHOID FEVER	48	2	0.5	0	1
2.1	PARATYPHOID FEVER A	5	2	0	0	0
2.2	PARATYPHOID FEVER B	0	0	.	.	.
2.3	PARATYPHOID FEVER C	1	1	0	0	0
2.9	PARATYPHOID FEVER NOS	9	0	.	.	.
3.1	SALMONELLA SEPTICEMIA	5	2	0	0	0
20.2	PLAGUE, SEPTICEMIC	297	1	0	0	0
20.8	OTHER TYPES OF PLAGUE	0	0	.	.	.
20.9	PLAGUE NOS	1	0	.	.	.
21.8	TULAREMIA NEC	0	0	.	.	.
21.9	TULAREMIA NOS	2	2	0	0	0
22.3	ANTHRAX, SEPTICEMIA	0	0	.	.	.
22.8	ANTHRAX, OTHER SPECIFIED	0	0	.	.	.
22.9	ANTHRAX, UNSPECIFIED	0	0	.	.	.
23	BRUCELLA MELITENSIS	2	0	.	.	.
23.1	BRUCELLA ABORTUS	0	0	.	.	.
23.2	BRUCELLA SUIS	6	3	0.333333	0	0.866778
23.3	BRUCELLA CANIS	0	0	.	.	.
23.8	BRUCELLOSIS NEC	1	0	.	.	.
23.9	BRUCELLOSIS, UNSPECIFIED	14	6	0.333333	0	0.710536
24.9	GLANDERS	6	0	.	.	.
25.9	MELOIDOSIS	10	0	.	.	.
27	LISTERIOSIS	3	2	0	0	0
34.1	SCARLET FEVER	2552	42	0.809524	0.690765	0.928283
38	SEPTICEMIA STAPHYLOCOCCAL	5	4	0.25	0	0.674352
38.1	SEPTICEMIA STAPHYLOCOCCAL	0	0	.	.	.
38.2	PNEUMOCOCCAL SEPTICEMIA	0	0	.	.	.
38.3	ANAEROBES SEPTICEMIA	0	0	.	.	.
38.4	GRAM-NEGATIVE SEPTICEMIA	22	5	0.2	0	0.550615
38.8	SEPTICEMIAS, OTHER SPECIF	0	0	.	.	.
38.9	SEPTICEMIA, NOS	111	6	0.5	0.0999167	0.900083
54.5	HERPETIC SEPTICEMIA	2	1	0	0	0
60	YELLOW FEVER, SYLVATIC	115	1	0	0	0
60.1	YELLOW FEVER, URBAN	3	1	0	0	0
60.9	YELLOW FEVER, UNSPEC	35	0	.	.	.
66	PHLEBOTOMUS FEVER	5	0	.	.	.
66.1	TICK-BORNE FEVER	0	0	.	.	.
66.2	VENEZUELAN EQUINE FEVER	0	0	.	.	.
66.3	MOSQUITO-BORNE FEVER NEC	0	0	.	.	.
66.8	ARTHROPOD VIRUS NEC	0	0	.	.	.
66.9	ARTHROPOD VIRUS NOS	306	1	0	0	0
78.2	SWEATING FEVER	10	5	0	0	0
79.8	VIRAL INFECTION OTHER S	154	4	0	0	0
79.9	VIRAL INFECTIONS UNSPECIFIED	5551	30	0.3	0.136015	0.463985
80.9	LOUSE-BORNE TYPHUS	2	0	.	.	.
81	MURINE TYPHUS	3	1	0	0	0
81.1	BRILL'S DISEASE	0	0	.	.	.
81.2	SCRUB TYPHUS	137	2	0	0	0
81.9	TYPHUS NOS	0	0	.	.	.
82.8	TICK-BORNE RICKETTS NEC	4	1	1	1	1
82.9	TICK-BORNE RICKETTS NOS	9	4	0	0	0
83	Q FEVER	56	0	.	.	.
83.1	TRENCH FEVER	8	1	0	0	0
83.2	RICKETTSIALPOX	2	2	0	0	0
83.8	RICKETTSIOSES NEC	2	1	0	0	0
83.9	RICKETTSIOSIS	2	1	0	0	0
84	MALARIA, FALCIPARUM	46	5	0.2	0	0.550615
84.1	VIVAX MALARIA	4	2	0	0	0
84.2	QUARTAN MALARIA	34	6	0.166667	0	0.464871
84.3	OVALE MALARIA	9	0	.	.	.
84.5	MIXED MALARIA	160	0	.	.	.
84.6	MALARIA UNSPECIFIED	37	19	0.315789	0.106777	0.524802
86.2	CHAGA'S DISEASE WITHOUT MENTION OF ORG	2	2	0	0	0
86.3	TRYPANOSOMIASIS, GAMBIAN	1	0	.	.	.
86.4	TRYPANOSOMIASIS, RHODESIAN	0	0	.	.	.
86.5	TRYPANOSOMIASIS, AFRICAN	0	0	.	.	.
86.9	TRYPANOSOMIASIS, UNSPEC	19	1	0	0	0
87	LOUSE-BORNE RELAPS FEVER	64	0	.	.	.
87.1	TICK-BORNE RELAPS FEVER	5	0	.	.	.
87.9	RELAPSING FEVER NOS	54	1	0	0	0
88	BARTONELLOSIS	624	9	0	0	0
88.8	OTHER ARTHROPOD-BORNE	2	1	1	1	1
88.9	ARTHROPOD-BORNE DIS NOS	23	10	0.6	0.296358	0.903642
100.8	LEPTOSPIROSIS, OTHER	0	0	.	.	.
780.3	FEBRILE CONVULSIONS	653	19	0.631579	0.414676	0.848482
780.6	FEVER	20028	150	0.58	0.501014	0.658986
780.7	BACTEREMIA	49102	232	0.646552	0.585037	0.708066
780.8	VIREMIA NOS	511	10	0.4	0.0963581	0.703642
Total		80884	601	0.59	0.55	0.64
*The Quebec provincial health care agency records ICD-9 diagnostic codes up to the first decimal position only. ICD-9 codes that are in the syndrome definition but do not appear in this table were not used in any of the 7,315,994 visits billed by the 1,098 participating physicians during the 2-year study period.
**Among the 7,315,994 visits to the 1,098 participating physicians during the 2-year study period.
***Among the 10,529 visits for which both the physician claim and the medical chart were available for verification.

## Sheet: CDC GI
GASTROINTESTINAL SYNDROME, CDC-DoD definition
ICD-9 code in claims*	Text label for ICD-9 code	No. visits in claims**	No. visits in verified claims***	PPV	95% CI
					Lower limit	Upper limit
1	CHOLERA D/T VIB CHOLERAE	13	10	0	0	0
1.1	CHOLERA D/T VIB EL TOR	24	11	0	0	0
1.9	CHOLERA NOS	21	6	0.166667	0	0.464871
3	SALMONELLA GASTROENTERITI	266	3	0.666667	0.133222	1
3.2	LOCAL SALMONELLA INF NOS	3	1	0	0	0
3.8	SALMONELLA INFECTION NEC	0	0	.	.	.
3.9	SALMONELLA INFECTION UNSP	30	12	0.75	0.505	0.995
4	SHIGELLA DYSENTERIAE	64	0	.	.	.
4.1	SHIGELLA FLEXNERI	0	0	.	.	.
4.2	SHIGELLA BOYDII	0	0	.	.	.
4.3	SHIGELLA SONNEI	2	2	0	0	0
4.8	SHIGELLA INFECTIONS OTHER	43	0	.	.	.
4.9	SHIGELLOSIS, UNSPECIFIED	4	1	1	1	1
5	STAPH FOOD POISONING	3	0	.	.	.
5.2	FOOD POIS D/T C. PERFRIN	102	1	0	0	0
5.3	FOOD POIS: CLOSTRID NEC	343	1	0	0	0
5.4	FOOD POIS: V. PARAHAEM	5	1	0	0	0
5.8	FOOD POISONING, OTHER BAC	0	0	.	.	.
5.9	FOOD POISONING NOS	175	4	1	1	1
6	AC AMEBIASIS W/O ABSCESS	9	3	0.333333	0	0.866778
6.8	AMEBIC INFECTION NEC	0	0	.	.	.
6.9	AMEBIASIS UNSPECIFIED	5	3	1	1	1
7	BALANTIDIASIS	23	9	0	0	0
7.1	GIARDIASIS	23	17	1	1	1
7.2	COCCIDIOSIS	7	2	0	0	0
7.3	INTEST TRICHOMONIASIS	0	0	.	.	.
7.4	CRYPTOSPORIDOSIS	0	0	.	.	.
7.5	CYCLOSPORIASIS	0	0	.	.	.
7.8	PROTOZOAL INTEST DIS NEC	4	1	0	0	0
7.9	PROTOZOAL INTEST DIS NOS	1	0	.	.	.
8	E COLI ENTERITIS	4	3	0.333333	0	0.866778
8.1	ARIZONA ENTERITIS	4	2	0.5	0	1
8.2	AEROBACTER ENTERITIS	1	0	.	.	.
8.3	PROTEUS ENTERITIS	0	0	.	.	.
8.4	INTEST. INFECT BY OTHER B	10	4	0.25	0	0.674352
8.5	BACTERIAL ENTERITIS NOS	24	0	.	.	.
8.6	ENTERITIS VIRAL OTHER	11	5	0.6	0.170586	1
8.8	ENTERITIS VIRAL NOS	343	3	1	1	1
9	ENTERITIS/COLITIS/GASTRO.	3818	25	0.8	0.6432	0.9568
9.1	COLITIS ENTERIT,GASTRO,IN	1920	21	0.714286	0.521067	0.907504
9.2	DIARRHEA, INFECTIOUS NOS	371	2	0.5	0	1
9.3	DIARRHEA OF INFECT ORIG	342	4	0.5	0.01	0.99
21.1	TULAREMIA, ENTERIC	0	0	.	.	.
22.2	GASTROINTESTINAL ANTHRAX	22	6	0.333333	0	0.710536
78.8	EPIDEMIC VOMITING SYND	204	4	0	0	0
127	ASCARIASIS	9	9	0.888889	0.683566	1
127.1	ANISAKIASIS	1	0	.	.	.
127.3	STRONGYLOIDIASIS	0	0	.	.	.
127.3	TRICHURIASIS	6	2	0.5	0	1
127.4	ENTEROBIASIS	253	4	0.5	0.01	0.99
127.5	CAPILLARIASIS	0	0	.	.	.
127.6	TRICHOSTRONGYLIASIS	0	0	.	.	.
127.7	INTEST HELMINTHIASIS NEC	0	0	.	.	.
127.8	MIXED INTESTINE HELMINTH	0	0	.	.	.
127.9	INTESTINAL HELMINTHIASIS,	251	3	1	1	1
129.9	INTESTINAL PARASITISM UNS	86	1	1	1	1
535	GASTRITIS, ACUTE	7439	54	0.777778	0.666891	0.888665
535.4	GASTRITIS,OTH SPEC.	4602	58	0.724138	0.609111	0.839165
535.5	GASTRITIS/DUODENITIS UNS	12534	88	0.727273	0.63422	0.820325
535.6	DUODENITIS UNS	398	3	0.666667	0.133222	1
536.2	VOMITING PERSISTENT	90	3	0.333333	0	0.866778
555	ENTERITIS SMALL INTESTINE	759	16	0	0	0
555.1	REG ENTERITIS, LG INTEST	1332	9	0.111111	0	0.316434
555.2	REG ENTERIT SM/LG INTEST	0	0	.	.	.
558.2	GASTROENTERITIS/COLITIS,	0	0	.	.	.
558.9	GASTROENTERITIS/COLITIS N	28890	120	0.85	0.786112	0.913888
567	PERITONITIS IN INFEC DIS	1	1	1	1	1
567.1	PNEUMOCOCCAL PERITONITIS	2	1	0	0	0
567.2	PERITONITIS SUPPURATIVE	8	5	0.2	0	0.550615
567.8	PERITONITIS, OTHER SPECIF	1	0	.	.	.
567.9	PERITONITIS NOS	43	0	.	.	.
568.9	PERITONEAL DISORDER NOS	231	3	0.666667	0.133222	1
569.9	INTESTINAL DISORDER NOS	523	9	0.555556	0.230912	0.880199
578	HEMATEMESIS	102	3	0.666667	0.133222	1
787	NAUSEA AND/OR VOMITING	4882	76	0.631579	0.523128	0.74003
787.1	HEARTBURN/PYROSIS	572	8	0.5	0.153518	0.846482
787.2	DYSPHAGIA	1918	40	0.6	0.448179	0.751821
787.3	FLATUL/ERUCTAT/GAS PAIN	434	8	0.5	0.153518	0.846482
787.4	PERISTALSIS, VISIBLE	3	2	0	0	0
787.9	DIARRHEA	2787	14	0.785714	0.570772	1.00066
789	ABDOMINAL PAIN,UNSPECIF.	82851	125	0.688	0.606778	0.769222
789.6	ABDOMINAL TENDERNESS, UNS	0	0	.	.	.
789.9	ABDOMEN/PELVIS SYMPTOMS O	3030	23	0.217391	0.0488193	0.385963
Total		162282	855	0.71	0.66	0.75
*The Quebec provincial health care agency records ICD-9 diagnostic codes up to the first decimal position only. ICD-9 codes that are in the syndrome definition but do not appear in this table were not used in any of the 7,315,994 visits billed by the 1,098 participating physicians during the 2-year study period.
**Among the 7,315,994 visits to the 1,098 participating physicians during the 2-year study period.
***Among the 10,529 visits for which both the physician claim and the medical chart were available for verification.

## Sheet: CDC Neuro
NEUROLOGICAL SYNDROME, CDC-DoD definition
ICD-9 code in claims*	Text label for ICD-9 code	No. visits in claims**	No. visits in verified claims***	PPV	95% CI
					Lower limit	Upper limit
3.2	SALMONELLA MENINGITIS	3	1	0	0	0
36	MENINGITIS (MENINGOCOCCAL	3	2	0.5	0	1
36.1	ENCEPHALITIS, MENINGOCOCCAL	8	5	0.6	0.170586	1
36.2	MENINGOCOCCEMIA INFECTION	23	2	0	0	0
36.8	INFECTION, MENINGOCOCCAL NEC	0	0	.	.	.
36.9	INFECTION, MENINGOCOCCAL NOS	0	0	.	.	.
47	COXSACKIE DUE TO MENINGIT	10	6	0	0	0
47.1	MENINGITIS D/T ECHO VIRUS	0	0	.	.	.
47.8	MENINGITIS, VIRAL NEC	0	0	.	.	.
47.9	MENINGITIS VIRAL NOS	10	5	0.6	0.170586	1
48.9	DIS ENTEROVIRAL OF CNS, NEC	3	0	.	.	.
49	CHORIOMENINGITIS, LYMPHOCYTIC	328	3	0	0	0
49.1	MENINGITIS, ADENOVIRUS	471	3	0	0	0
49.8	ENCEPHALITIS VIRAL OTHER	0	0	.	.	.
49.9	ENCEPHALITIS VIRAL NOS	58	1	0	0	0
52	POSTVARICELLA ENCEPHALIT	0	0	.	.	.
53	HERPES ZOSTER WITH MENINGITIS	396	13	0	0	0
53.1	HERPES ZOSTER W UNSPED NER S	42	2	0	0	0
54.3	HERPETIC MENINGOENCEPHALI	8	2	0	0	0
54.7	HSV, MENINGITIS	16	8	0.125	0	0.354177
55	POSTMEASLES ENCEPHALITIS	10	1	0	0	0
56	RUBELLA, WITH NEURO COMPLI	4	4	0	0	0
61.9	DENGUE	2	0	.	.	.
62	ENCEPHALITIS, JAPANESE	7	1	0	0	0
62.1	ENCEPHALITIS, WESTERN EQUINE	0	0	.	.	.
62.2	ENCEPHALITIS, EASTERN EQUINE	0	0	.	.	.
62.3	ST.LOUIS ENCEPHALITIS	0	0	.	.	.
62.4	ENCEPHALITIS, AUSTRALIAN	0	0	.	.	.
62.5	ENCEPHALITIS, CALIFORNIA VIRUS	1	1	0	0	0
62.8	ENCEPHALITIS, MOSQUITO-BORNE NEC	0	0	.	.	.
62.9	ENCEPHALITIS, MOSQUITO-BORNE NOS	1	1	0	0	0
63	ENCEPHALITIS, RUSSIAN SPRING-SUMMER	1	0	.	.	.
63.1	LOUPING ILL	0	0	.	.	.
63.2	ENCEPHALITIS, CENTRAL EUROPEAN	0	0	.	.	.
63.8	ENCEPHALITIS, VIRAL, TICK-BORNE NEC	0	0	.	.	.
63.9	ENCEPHALITIS, TICK-BORNE VIRAL NOS	3	3	0	0	0
64.9	ENCEPHALITIS ARTHPD-BORNE VIRAL NEC	7	0	.	.	.
66.4	WEST NILE FEVER	0	0	.	.	.
71.9	RABIES	7	0	.	.	.
72.1	MUMPS MENINGITIS	7	4	0	0	0
72.2	MUMPS ENCEPHALITIS	0	0	.	.	.
84.9	MALARIA COMPLICATED NEC	16	1	0	0	0
86.2	CHAGA'S DISEASE WITHOUT MENTION OF ORG	2	2	0	0	0
86.3	TRYPANOSOMIASIS, GAMBIAN	1	0	.	.	.
86.4	TRYPANOSOMIASIS, RHODESIAN	0	0	.	.	.
86.5	TRYPANOSOMIASIS, AFRICAN	0	0	.	.	.
91.8	ACUTE SYPHIL MENINGITIS	4	2	0	0	0
98.8	GONOCCOCAL, MENINGITIS	34	12	0	0	0
100.8	LEPTOSPIRAL INFECTIONS,MENINGITIS (ASEPTIC)	0	0	.	.	.
114.2	COCCIDIODAL MENINGITIS	0	0	.	.	.
115	HISTOPLASMOSIS MENINGITIS	1	1	0	0	0
115.1	HISTOPLASMA DUBOISII, MENINGITIS	0	0	.	.	.
115.9	HISTOPLASMOSIS, UNSPEC, MENINGITIS	12	5	0.2	0	0.550615
117.5	CRYPTOCOCCOSIS	0	0	.	.	.
130	TOXOPLASMOSIS, MENINGOENCEPHALITIS	0	0	.	.	.
136.2	SPECIFIC INF BY FREE LIVING AMOEBA	0	0	.	.	.
293	DELIRIUM, ACUTE	67	2	0.5	0	1
293.1	CONFUSIONAL STATE(del subacute)	9	4	0.25	0	0.674352
307.8	TENSION HEADACHE	3311	70	0.742857	0.64047	0.845245
320	HEMOPHILUS MENINGITIS	0	0	.	.	.
320.1	MENINGITIS PNEUMOCOCCAL	0	0	.	.	.
320.2	MENINGITIS, STREPTOCOCCAL	1	0	.	.	.
320.3	MENINGITIS, STAPHYLOCOCCAL	0	0	.	.	.
320.7	MENG, IN OTH BCTRL DISEASE CE	4	1	0	0	0
320.8	BACTERIAL MENINGITIS OTHER	0	0	.	.	.
320.9	BACTERIAL MENINGITIS NOS	6	6	0	0	0
321	MENINGITIS, CRYPTOCOCCAL	0	0	.	.	.
321.1	MENINGITIS IN OTH. FUNGAL	1	1	0	0	0
321.2	Meningitis d/t viral diseases NEC	0	0	.	.	.
321.3	MENINGITIS D/T TRYPANOSOMIASIS	2	1	0	0	0
321.4	MENINGITIS IN SARCOIDOSIS	1	1	0	0	0
321.8	MENG D/T OTH NONBACT ORGANISM CE	2	0	.	.	.
322	MENINGITIS, NONPYOGENIC	18	5	0.2	0	0.550615
322.1	MENINGITIS, EOSINOPHILIC	0	0	.	.	.
322.9	MENINGITIS NOS	240	3	0.666667	0.133222	1
323	ENCEPHALITIS IN VIRAL DISEASE CE	16	2	1	1	1
323.1	ENCEPHALITIS IN RICKETTSIAL DIS CE	0	0	.	.	.
323.2	ENCEPHALITIS IN PROTOZOAL DIS CE	18	12	0	0	0
323.4	ENCEPHALITIS, OTH D/T INFECTION CE	4	1	1	1	1
323.5	ENCEPHALITIS, POSTIMMUNIZATION	0	0	.	.	.
323.6	ENCEPHALITIS POSTINFECTIO	0	0	.	.	.
323.7	ENCEPHALITIS, TOXIC	1	1	0	0	0
323.8	OTHER CAUSES OF ENCEPHALI	0	0	.	.	.
323.9	ENCEPHALITIS NOS	204	5	0.2	0	0.550615
348.3	ENCEPHALOPATHY NOS	175	3	0.333333	0	0.866778
780	ALTERATION OF AWARENESS	1603	47	0.0212766	0	0.0625327
780.3	CONVULSIONS	653	19	0.526316	0.3018	0.750832
781.6	MENINGISMUS	21	11	0.181818	0	0.409749
784	HEADACHE	32290	683	0.7306	0.697328	0.763873
784.3	APHASIA	90	2	1	1	1
Total		40236	971	0.67	0.64	0.7
*The Quebec provincial health care agency records ICD-9 diagnostic codes up to the first decimal position only. ICD-9 codes that are in the syndrome definition but do not appear in this table were not used in any of the 7,315,994 visits billed by the 1,098 participating physicians during the 2-year study period.
**Among the 7,315,994 visits to the 1,098 participating physicians during the 2-year study period.
***Among the 10,529 visits for which both the physician claim and the medical chart were available for verification.

## Sheet: CDC Rash
RASH SYNDROME, CDC-DoD definition
ICD-9 code in claims*	Text label for ICD-9 code	No. visits in claims**	No. visits in verified claims***	PPV	95% CI
					Lower limit	Upper limit
26	SPIRILLARY FEVER	0	0	.	.	.
26.1	STREPTOBACILLARY FEVER	1	1	0	0	0
26.9	RAT-BITE FEVER UNSPECIFIED	6	3	0	0	0
50	SMALL POX, VARIOLA MAJOR	3	3	0	0	0
50.1	SMALL POX, ALASTRIM	0	0	.	.	.
50.2	SMALL POX, MODIFIED	0	0	.	.	.
50.9	SMALLPOX NOS	2	2	0.5	0	1
51	COWPOX	3730	20	0	0	0
51.1	PSEUDOCOWPOX	42	0	.	.	.
51.2	DERMATITIS PUSTULAR, CONT	44	1	1	1	1
51.9	PARAVACCINIA NOS	30	1	1	1	1
52.7	VARICELLA COMPLICAT NEC	0	0	.	.	.
52.8	VARICELLA W/UNSPECIFIED C	0	0	.	.	.
52.9	VARICELLA NOS	1558	26	0.884615	0.761809	1
53.2	HERPES ZOSTER DERMATITIS E	229	4	1	1	1
53.7	HERPES ZOSTER WITH OTHER SPECIF COMPLIC	19	6	1	1	1
53.8	H.Z. W/ UNSPEC. COMPLICATION	17	8	1	1	1
53.9	HERPES ZOSTER NOS W/O COM	10551	168	0.869048	0.818035	0.920061
54	ECZEMA HERPETICUM	708	13	0.615385	0.350918	0.879851
54.7	HERPES SIMPLEX W/OTH.SPEC	16	8	0.75	0.449938	1
54.8	HERPES SIMPLEX, W/UNS.COM	5	4	0.5	0.01	0.99
54.9	HERPES SIMPLEX NOS	8763	153	0.660131	0.585075	0.735186
55.7	MEASLES COMPLICATION NEC	0	0	.	.	.
55.8	MEASLES COMPLICATION NOS	141	4	0	0	0
55.9	MEASLES UNCOMPLICATED	82	3	0.333333	0	0.866778
56.7	RUBELLA COMPLICATION NEC	2	1	0	0	0
56.8	RUBELLA COMPLICATION NOS	0	0	.	.	.
56.9	RUBELLA UNCOMPLICATED	172	1	0	0	0
57	ERYTHEMIA INFECT.(5TH DIS	238	2	1	1	1
57.8	EXANTHEMATA VIRAL OTHER S	619	9	0.555556	0.230912	0.880199
57.9	EXANTHEM VIRAL, UNSPECIFI	1440	15	0.4	0.152077	0.647923
74.3	HAND/FOOT AND MOUTH DISEA	49	1	1	1	1
78	MOLLUSCUM CONTAGIOSUM	3323	43	0.837209	0.726864	0.947555
82	ROCKY MOUNTAIN SPOTTED FE	2	2	0.5	0	1
83.2	RICKETTSIALPOX	2	2	0	0	0
692.9	DERMATITIS UNSPECIFIED CA	73677	181	0.640884	0.570993	0.710775
695	ERYTHEMA TOXIC	53	3	0.666667	0.133222	1
695.1	ERYTHEMA MULTIFORME	106	1	1	1	1
695.2	ERYTHEMA NODOSUM	135	5	1	1	1
695.3	ROSACEA	554	10	0.7	0.415969	0.984031
695.4	LUPUS ERYTHEMATOSUS	540	9	0.555556	0.230912	0.880199
695.8	ERYTHEMATOUS CONDITIONS O	735	12	0.666667	0.399944	0.933389
695.9	ERYTHEMATOUS CONDITION N	3183	41	0.536585	0.383945	0.689225
782.1	RASH/OTHER NONSPEC SKIN E	16123	131	0.740458	0.665387	0.815529
Total		126900	897	0.66	0.62	0.7
*The Quebec provincial health care agency records ICD-9 diagnostic codes up to the first decimal position only. ICD-9 codes that are in the syndrome definition but do not appear in this table were not used in any of the 7,315,994 visits billed by the 1,098 participating physicians during the 2-year study period.
**Among the 7,315,994 visits to the 1,098 participating physicians during the 2-year study period.
***Among the 10,529 visits for which both the physician claim and the medical chart were available for verification.

## Sheet: CDC Resp
RESPIRATORY SYNDROME, CDC-DoD definition
ICD-9 code in claims*	Text label for ICD-9 code	No. visits in claims**	No. visits in verified claims***	PPV	95% CI
					Lower limit	Upper limit
3.2	SALMONELLA PNEUMONIA	3	1	0	0	0
20.3	PRIMARY PNEUMONIC PLAGUE	0	0	.	.	.
20.4	SECONDARY PNEUMON PLAGUE	7	3	0	0	0
20.5	PNEUMONIC PLAGUE NOS	0	0	.	.	.
21.2	PULMONARY TULAREMIA	0	0	.	.	.
22.1	PULMONARY ANTHRAX	0	0	.	.	.
31	MYCOBACTERIA, PULMONARY	7	3	0.333333	0	0.866778
31.8	MYCOBACTERIAL DIS NEC	6	1	0	0	0
31.9	MYCOBACTERIA DISEASES/UNS	15	5	0.2	0	0.550615
32	FAUCIAL DIPHTHERIA	52	0	.	.	.
32.1	NASOPHARYNX DIPHTHERIA	8	5	0.6	0.170586	1
32.2	ANT NASAL DIPHTHERIA	7	2	0	0	0
32.3	LARYNGEAL DIPHTHERIA	1	0	.	.	.
32.8	DIPHTHERIA NEC	0	0	.	.	.
32.9	DIPHTHERIA NOS	2	2	0.5	0	1
33	BORDETELLA PERTUSSIS	39	9	1	1	1
33.1	BORDETELLA PARAPERTUSSIS	0	0	.	.	.
33.8	WHOOPING COUGH NEC	5	1	1	1	1
33.9	WHOOPING COUGH(UNSPE.ORGA	325	0	.	.	.
34	STREP SORE THROAT	735	2	1	1	1
52.1	VARICELLA WITH PNEUMONIA	0	0	.	.	.
55.1	POSTMEASLES PNEUMONIA	8	3	0.666667	0.133222	1
55.2	POSTMEASLES OTITIS MEDIA	502	1	0	0	0
73	ORNITHOSIS, WITH PNEUMONIA	0	0	.	.	.
73.7	ORNITHOSIS, OTHER SPECIF COMPLIC	0	0	.	.	.
73.8	ORNITHOSIS, UNSPECIFIED COMPLIC	0	0	.	.	.
73.9	ORNITHOSIS, UNSPECIFIED	1	1	0	0	0
75.9	MONONUCLEOSIS, INFECTIOUS	2373	2	1	1	1
79	ADENOVIRUS INFECT NOS	507	0	.	.	.
79.1	ECHO VIRUS INFECT NOS	3	0	.	.	.
79.2	COXSACKIE VIRUS	12	7	0.571429	0.204823	0.938035
79.3	RHINOVIRUS INFECT NOS	2	1	1	1	1
79.6	RESPIRATORY SYNCYTIAL VIR	0	0	.	.	.
79.8	HANTAVIRUS INFECTION	154	4	0	0	0
98.6	GONOCCOCAL, INFECTION OF PHARYNX	4	1	1	1	1
114.5	PULM COCCIDIOIDOMYCOS,UN	0	0	.	.	.
114.9	COCCIDIOIDOMYCOSIS NOS	2	1	0	0	0
115	HISTOPLASMA CAPSULATUM NOS	1	1	0	0	0
115.1	HISTOPLASMA DUBOISII NOS	0	0	.	.	.
115.9	HISTOPLASMOSIS UNS	12	5	0.2	0	0.550615
116	BLASTOMYCOSIS	5	1	0	0	0
116.1	PARACOCCIDIOIDOMYCOSIS	2	2	0	0	0
117.1	SPOROTRICHOSIS	1	1	0	0	0
117.3	PULMONARY ASPERGILLOSIS	15	6	0.5	0.0999167	0.900083
117.5	CRYPTOCOCCOSIS	0	0	.	.	.
130.4	TOXOPLASMA PNEUMONITIS	0	0	.	.	.
136.3	PNEUMOCYSTOSIS	1	0	.	.	.
381	OTITIS MEDIA NONSUP ACUTE	9398	16	0.9375	0.81889	1
381.4	OTITIS MEDIA NONSUPPURATI	6730	17	0.529412	0.292138	0.766685
381.5	EUSTACHIAN SALPINGITIS	144	0	.	.	.
382	OM SUPPURATIVE & UNSPEC	6326	17	0.882353	0.729194	1
382.4	OM SUPPURATIVE NOS	154	0	.	.	.
382.9	OTITIS MEDIA NOS	95165	68	0.75	0.647079	0.852921
460	NASOPHARYNGITIS, ACUTE	1	0	.	.	.
460.9	NASOPHARYNGITIS, ACUTE NOS	20179	11	1	1	1
461	MAXILLARY SINUSITIS, ACUT	4234	5	1	1	1
461.1	SINUSITIS, FRONTAL-ACUTE	145	1	1	1	1
461.2	SINUSITIS, ETHMOIDAL	43	7	0.571429	0.204823	0.938035
461.3	SINUSITIS,ACUTE SPHENOIDA	2	1	1	1	1
461.8	SINUSITIS, ACUTE, OTHER	1466	5	0.4	0	0.829414
461.9	SINUSITIS, ACUTE NOS	39976	57	0.912281	0.838841	0.98572
462	PHARYNGITIS, ACUTE	10	0	.	.	.
462.9	PHARYNGITIS, ACUTE NOS	39695	24	1	1	1
463	TONSILLITIS, ACUTE	3	0	.	.	.
463.9	TONSILLITIS, ACUTE NOS	32676	16	0.9375	0.81889	1
464	LARYNGITIS, ACUTE	12319	27	0.814815	0.668291	0.961338
464.1	TRACHEITIS, ACUTE	9716	13	0.923077	0.778223	1
464.2	LARYNGOTRACHEITIS, ACUTE	1214	1	1	1	1
464.3	EPIGLOTTITIS, ACUTE	32	16	0.6875	0.460379	0.914621
464.4	CROUP	916	0	.	.	.
464.5	SUPRAGLOTTIS, UNS	0	0	.	.	.
465	LARYNGOPHARYNGITIS, ACUTE	4679	3	0.666667	0.133222	1
465.8	URI, OTHER MULT. SITES	3809	11	0.909091	0.739201	1
465.9	URI, ACUTE NOS	223128	84	0.904762	0.841987	0.967537
466	BRONCHITIS ACUTE	62662	67	0.895522	0.822279	0.968766
466.1	BRONCHIOLITIS ACUTE	5006	10	0.9	0.714058	1
478.9	RESPIRATORY TRACT DISEASE	85	0	.	.	.
480	ADENOVIRAL PNEUMONIA	636	2	1	1	1
480.1	PNEUMONIA,RESP.SYNCYTIAL	3	3	0.666667	0.133222	1
480.2	PARINFLUENZA VIRAL PNEUM	1	0	.	.	.
480.8	VIRAL PNEUMONIA NEC	1	1	1	1	1
480.9	PNEUMONIA, VIRAL	1044	0	.	.	.
481.9	PNEUMOCOCCAL PNEUMONIA	837	1	1	1	1
482	PNEUMONIA-KLEBSIELLA PNEU	311	0	.	.	.
482.1	PNEUMONIA DUE TO PSEUDOMO	26	6	0.5	0.0999167	0.900083
482.2	H.INFLUENZAE PNEUMONIA	8	4	1	1	1
482.3	STREPTOCOCCUS UNSPECIFIED	0	0	.	.	.
482.4	STAPH PNEUMONIA NOS	0	0	.	.	.
482.8	PNEUMONIA/ANAEROBES	25	4	1	1	1
482.9	PNEUMONIA, BACTERIAL NOS	2915	2	0.5	0	1
483	PNEUMONIA MYCOPLASMA	0	0	.	.	.
483.1	PNEUMONIA DUE TO CHLAMYD	0	0	.	.	.
483.8	PNEUMONIA DUE TO ORGANISM NEC	0	0	.	.	.
484.1	PNEUM W CYTOMEG INCL DIS	10	4	0.5	0.01	0.99
484.3	PNEUMONIA IN WHOOP COUGH	0	0	.	.	.
484.5	PNEUMONIA IN ANTHRAX	1	1	1	1	1
484.6	PNEUMONIA IN ASPERGILLOSI	0	0	.	.	.
484.7	PNEUM IN OTH SYS MYCOSES	0	0	.	.	.
484.8	PNEUM IN INFECT DIS NEC	1	1	1	1	1
485.9	BRONCHOPNEUMONIA ORGANISM	2255	4	1	1	1
486	PNEUMONIA, ORGANISM NOS	4	1	1	1	1
486.9	PNEUMONIA, ORGANISM NOS	19755	18	0.833333	0.661165	1
487	INFLUENZA WITH PNEUMONIA	278	1	1	1	1
487.1	INFLUENZA W/OTH. RESP. MA	28029	41	0.878049	0.777884	0.978214
487.8	INFLUENZA W/OTHR MANIFEST	57	0	.	.	.
490	BRONCHITIS NOS	7	1	0	0	0
490.9	BRONCHITIS NOS	60126	44	0.886364	0.792587	0.98014
493	ASTHMA, EXTRINSIC	3265	10	0.9	0.714058	1
493.1	ASTHMA, INTRINSIC	25	9	1	1	1
493.9	ASTHMA, UNSPEC	96278	78	0.846154	0.766083	0.926225
511	PLEURISY W/O EFFUSION	139	1	.	.	.
511.1	PLEURAL EFFUSION-VIRAL(NO	0	0	.	.	.
511.8	HEMOTHORAX	9	6	0.666667	0.289464	1
511.9	PLEURAL EFFUSION UNSPECIF	366	2	1	1	1
513	ABSCESS LUNG	21	7	0.714286	0.379622	1
513.1	ABSCESS OF MEDIASTINUM	1	1	0	0	0
514.9	EDEMA PULMONARY	101	0	.	.	.
518	PULMONARY COLLAPSE	143	2	0.5	0	1
518.4	EDEMA LUNG ACUTE NOS	246	1	0	0	0
518.8	RESPIRATORY FAILURE, ACUTE	2572	11	0.363636	0.0793565	0.647916
519.2	MEDIASTINITIS	7	3	0.333333	0	0.866778
519.3	MEDIASTINUM, DISEASES NEC	11	6	0.166667	0	0.464871
769.9	RESPIRATORY DISTRESS SYND	24	1	0	0	0
782.5	CYANOSIS	42	0	.	.	.
784.1	PAIN IN THROAT	3061	6	1	1	1
786	RESPIRATORY ABNORMALITY	24392	69	0.304348	0.195777	0.412919
786.1	STRIDOR	54	0	.	.	.
786.2	COUGH	43291	69	0.898551	0.82731	0.969791
786.3	HEMOPTYSIS	930	5	0.6	0.170586	1
786.5	CHEST PAIN, UNSPECIFIED	33582	67	0.686567	0.575488	0.797646
786.7	ABNORMAL CHEST SOUNDS	30	0	.	.	.
786.9	RESP SYS/CHEST SYMP NEC	2204	7	0.571429	0.204823	0.938035
799.1	RESPIRATORY ARREST	70	2	0.5	0	1
Total		911924	1050	0.85	0.83	0.88
*The Quebec provincial health care agency records ICD-9 diagnostic codes up to the first decimal position only. ICD-9 codes that are in the syndrome definition but do not appear in this table were not used in any of the 7,315,994 visits billed by the 1,098 participating physicians during the 2-year study period.
**Among the 7,315,994 visits to the 1,098 participating physicians during the 2-year study period.
***Among the 10,529 visits for which both the physician claim and the medical chart were available for verification.

## Sheet: RODS Fever
FEVER SYNDROME, RODS definition
ICD-9 code in claims*	Text label for ICD-9 code	No. visits in claims**	No. visits in verified claims***	PPV	95% CI
					Lower limit	Upper limit
2	Typhoid/paratyphoid fever	48	2	0.5	0	1
2.1	Paratyphoid fever a	5	2	0	0	0
2.2	Paratyphoid fever b	0	0	.	.	.
2.3	Paratyphoid fever c	1	1	0	0	0
2.9	Paratyphoid fever nos	9	0	.	.	.
20	Bubonic plague	1	1	0	0	0
20.2	Septicemic plague	297	1	0	0	0
20.8	Other specified types of plague	0	0	.	.	.
20.9	Plague, unspecified	1	0	.	.	.
21	Ulceroglandular tularemia	0	0	.	.	.
21.3	Oculoglandular tularemia	0	0	.	.	.
21.8	Other specified tularemia	0	0	.	.	.
21.9	Unspecified tularemia	2	2	0	0	0
22.3	Anthrax septicemia	0	0	.	.	.
22.8	Other specified manifestations of anthrax	0	0	.	.	.
22.9	Anthrax, unspecified	0	0	.	.	.
23	Brucella melitensis	2	0	.	.	.
23.1	Brucella abortus	0	0	.	.	.
23.2	Brucella suis	6	3	0.333333	0	0.866778
23.3	Brucella canis	0	0	.	.	.
23.8	Other brucellosis	1	0	.	.	.
23.9	Brucellosis, unspecified	14	6	0.333333	0	0.710536
60	Sylvatic yellow fever	115	1	0	0	0
60.1	Urban yellow fever	3	1	0	0	0
60.9	Yellow fever, unspecified	35	0	.	.	.
66.3	Mosquito-borne viral fever, Chikungunya	0	0	.	.	.
73.7	Ornithosis with other specified complications	0	0	.	.	.
73.8	Ornithosis with unspecified complication	0	0	.	.	.
73.9	Ornithosis, unspecified	1	1	0	0	0
75	Infectious mononucleosis	0	0	.	.	.
78.3	Cat-scratch disease	14	4	0	0	0
78.5	Cytomegaloviral disease	30	4	0.5	0.01	0.99
79	Viral inf in oth dis/nos	507	0	.	.	.
79.1	Echo virus infection in conditions classified elsewhere and of unspecified site	3	0	.	.	.
79.2	Coxsackie virus infection in conditions classified elsewhere and of unspecified site	12	7	0.571429	0.204823	0.938035
79.9	Viral infection nos	5551	30	0.333333	0.164643	0.502023
81.2	Scrub typhus	137	2	0	0	0
130.7	Toxoplasmosis of other specified sites	0	0	.	.	.
130.8	Multisystemic disseminated toxoplasmosis	0	0	.	.	.
130.9	Toxoplasmosis, unspecified	5	4	0.5	0.01	0.99
461	Acute maxillary sinusitis	4234	5	0.4	0	0.829414
461.1	Acute frontal sinusitis	145	1	1	1	1
461.2	Acute ethmoidal sinusitis	43	7	0.571429	0.204823	0.938035
461.3	Acute sphenoidal sinusitis	2	1	0	0	0
461.8	Other acute sinusitis	1466	5	0.4	0	0.829414
461.9	Acute sinusitis, unspecified	39976	57	0.824561	0.725821	0.923301
464	Acute laryngitis	12319	27	0.481481	0.29301	0.669953
464.5	Supraglottitis	0	0	.	.	.
472.1	Chronic pharyngitis	466	4	0	0	0
487.8	Influenza with other manifestations	57	0	.	.	.
780.4	Dizziness and giddiness	23611	257	0.354086	0.295616	0.412555
780.6	Fever	20028	150	0.613333	0.535399	0.691267
780.7	Malaise and fatigue	49102	232	0.663793	0.603003	0.724583
780.8	Hyperhidrosis	511	10	0.4	0.0963581	0.703642
780.9	Other general symptoms	2004	29	0.206897	0.0594622	0.354331
783	Anorexia	1236	16	0.125	0	0.287052
Total		162000	873	0.6	0.56	0.64
*The Quebec provincial health care agency records ICD-9 diagnostic codes up to the first decimal position only. ICD-9 codes that are in the syndrome definition but do not appear in this table were not used in any of the 7,315,994 visits billed by the 1,098 participating physicians during the 2-year study period.
**Among the 7,315,994 visits to the 1,098 participating physicians during the 2-year study period.
***Among the 10,529 visits for which both the physician claim and the medical chart were available for verification.

## Sheet: RODS GI
GASTROINTESTINAL SYNDROME, RODS definition
ICD-9 code in claims*	Text label for ICD-9 code	No. visits in claims**	No. visits in verified claims***	PPV	95% CI
					Lower limit	Upper limit
1	Cholera due to Vibrio cholerae	13	10	0	0	0
1.1	Cholera due to Vibrio cholerae el tor	24	11	0	0	0
1.9	Cholera, unspecified	21	6	0.166667	0	0.464871
3	Salmonella gastroenteritis	266	3	0.666667	0.133222	1
4	Shigella dysenteriae	64	0	.	.	.
4.1	Shigella flexneri	0	0	.	.	.
4.2	Shigella boydii	0	0	.	.	.
4.3	Shigella sonnei	2	2	0	0	0
4.8	Other specified shigella infections	43	0	.	.	.
4.9	Shigellosis, unspecified	4	1	1	1	1
5	Staphylococcal food poisoning	3	0	.	.	.
5.2	Food poisoning due to Clostridium perfringens (C. welchii)	102	1	0	0	0
5.3	Food poisoning due to other clostridia	343	1	0	0	0
5.4	Food poisoning due to vibrio parahaemolyticus	5	1	0	0	0
5.8	Other bacterial food poisoning	0	0	.	.	.
5.9	Food poisoning, unspecified	175	4	1	1	1
6	Acute amebic dysentery without mention of abscess	9	3	0.333333	0	0.866778
6.1	Chronic intestinal amebiasis without mention of abscess	7	2	0	0	0
7	Balantidiasis	23	9	0	0	0
7.1	GIardiasis	23	17	0.941176	0.829325	1
7.2	Coccidiosis	7	2	0	0	0
7.3	Intestinal trichomoniasis	0	0	.	.	.
7.4	Cryptosporidiosis	0	0	.	.	.
7.5	Cyclosporiasis	0	0	.	.	.
7.8	Other specified protozoal intestinal diseases	4	1	0	0	0
7.9	Unspecified protozoal intestinal disease	1	0	.	.	.
8	Intestinal infection due to escherichia coli [e. Coli]	4	3	0.333333	0	0.866778
8.1	Intestinal infection due to arizona group of paracolon bacilli	4	2	0.5	0	1
8.2	Intestinal infection due to aerobacter aerogenes	1	0	.	.	.
8.3	Intestinal infection due to proteus (mirabilis) (morganii)	0	0	.	.	.
8.4	Intestinal infection due to other specified bacteria	10	4	0	0	0
8.5	Bacterial enteritis nos	24	0	.	.	.
8.6	Enteritis due to specified virus	11	5	0.6	0.170586	1
8.8	Intestinal infection due to other organism, not elsewhere classified	343	3	1	1	1
9	Infectious colitis, enteritis, and gastroenteritis	3818	25	0.76	0.592583	0.927417
9.1	Colitis, enteritis, and gastroenteritis of presumed infectious origin	1920	21	0.904762	0.779211	1
9.2	Infectious diarrhea	371	2	0.5	0	1
9.3	Diarrhea of presumed infectious origin	342	4	0.5	0.01	0.99
21.1	Enteric tularemia	0	0	.	.	.
22.2	GI anthrax	22	6	0.333333	0	0.710536
32.8	Diphtheritic peritonitis	0	0	.	.	.
535	Acute gastritis	7439	54	0.666667	0.540933	0.792401
536.2	Persistent vomiting	90	3	0.333333	0	0.866778
555	Regional enteritis of small intestine	759	16	0.4375	0.194422	0.680578
555.1	Regional enteritis of large intestine	1332	9	0.777778	0.506161	1
555.2	Regional enteritis of small intestine with large intestine	0	0	.	.	.
555.9	Regional enteritis of unspecified site	6993	95	0.884211	0.819867	0.948554
556	Ulcerative (chronic) enterocolitis	0	0	.	.	.
556.1	Ulcerative (chronic) ileocolitis	0	0	.	.	.
556.2	Ulcerative (chronic) proctitis	0	0	.	.	.
556.3	Ulcerative (chronic) proctosigmoiditis	0	0	.	.	.
556.4	Pseudopolyposis of colon	0	0	.	.	.
556.5	Left-sided ulcerative (chronic) colitis	0	0	.	.	.
556.6	Universal ulcerative (chronic) colitis	0	0	.	.	.
556.8	Other ulcerative colitis	0	0	.	.	.
556.9	Ulcerative colitis, unspecified	2154	32	0.875	0.760412	0.989588
558	Other and unspecified noninfectious gastroenteritis and colitis	0	0	.	.	.
558.1	Gastroenteritis and colitis due to radiation	0	0	.	.	.
558.2	Toxic gastroenteritis and colitis	0	0	.	.	.
558.3	Allergic gastroenteritis and colitis	0	0	.	.	.
558.9	Other and unspecified noninfectious gastroenteritis and colitis	28890	120	0.858333	0.795942	0.920725
569.8	Ulceration of intestine	162	4	1	1	1
787	Nausea and vomiting	4882	76	0.618421	0.509206	0.727636
787.9	Diarrhea	2787	14	0.5	0.238084	0.761916
789	Abdominal pain	82851	125	0.608	0.522415	0.693585
789.4	Abdominal rigidity	7	6	0.333333	0	0.710536
Total		146355	703	0.68	0.63	0.73
*The Quebec provincial health care agency records ICD-9 diagnostic codes up to the first decimal position only. ICD-9 codes that are in the syndrome definition but do not appear in this table were not used in any of the 7,315,994 visits billed by the 1,098 participating physicians during the 2-year study period.
**Among the 7,315,994 visits to the 1,098 participating physicians during the 2-year study period.
***Among the 10,529 visits for which both the physician claim and the medical chart were available for verification.

## Sheet: RODS Neuro
NEUROLOGICAL SYNDROME, RODS definition
ICD-9 code in claims*	Text label for ICD-9 code	No. visits in claims**	No. visits in verified claims***	PPV	95% CI
					Lower limit	Upper limit
13	Tuberculous meningitis	4	1	0	0	0
13.6	Tuberculous encephalitis or myelitis	0	0	.	.	.
13.8	Other specified tuberculosis of central nervous system	0	0	.	.	.
13.9	Unspecified tuberculosis of central nervous system	0	0	.	.	.
36	Meningococcal meningitis	3	2	0.5	0	1
36.1	Meningococcal encephalitis	8	5	0.6	0.170586	1
36.2	Meningococcemia	23	2	0	0	0
36.8	Meningococcal infect nec	0	0	.	.	.
36.9	Meningococcal infect nos	0	0	.	.	.
47	Coxsackie virus meningitis	10	6	0	0	0
47.1	Echo virus meningitis	0	0	.	.	.
47.8	Viral meningitis nec	0	0	.	.	.
47.9	Viral meningitis nos	10	5	0.6	0.170586	1
48	Oth enteroviral cns dis	0	0	.	.	.
49	Lymphocytic choriomeningitis	328	3	0	0	0
49.1	Adenoviral meningitis	471	3	0	0	0
49.8	Viral encephalitis nec	0	0	.	.	.
49.9	Viral encephalitis nos	58	1	0	0	0
52	Postvaricella encephalitis	0	0	.	.	.
54.3	Herpetic meningoencephalitis	8	2	0	0	0
54.7	Herpes simplex meningitis	16	8	0	0	0
55	Postmeasles encephalitis	10	1	0	0	0
56	Encephalomyelitis due to rubella	4	4	0	0	0
62	Japanese encephalitis	7	1	0	0	0
62.1	Western equine encephalitis	0	0	.	.	.
62.2	Eastern equine encephalitis	0	0	.	.	.
62.3	St. Louis encephalitis	0	0	.	.	.
62.4	Australian encephalitis	0	0	.	.	.
62.5	California virus encephalitis	1	1	0	0	0
62.8	Other specified mosquito-borne viral encephalitis	0	0	.	.	.
62.9	Mosquito-borne viral encephalitis, unspecified	1	1	0	0	0
63	Russian spring-summer (taiga) encephalitis	1	0	.	.	.
63.1	Louping ill	0	0	.	.	.
63.2	Central European encephalitis	0	0	.	.	.
63.8	Other specified tick-borne viral encephalitis	0	0	.	.	.
63.9	Tick-borne viral encephalitis, unspecified	3	3	0	0	0
64	Viral encephalitis arthropod nec	0	0	.	.	.
66.2	Venezuelan equine fever (encephalitis)	0	0	.	.	.
66.4	West Nile fever (encephalitis)	0	0	.	.	.
71	Rabies	0	0	.	.	.
72.2	Mumps encephalitis	0	0	.	.	.
94.2	Syphilitic meningitis	10	5	0	0	0
94.8	Syphilitic encephalitis	1	1	0	0	0
100.8	Leptospiral meningitis	0	0	.	.	.
114.2	Coccidioidal meningitis	0	0	.	.	.
115	Histoplasma capsulatum meningitis	1	1	0	0	0
115.1	Histoplasma duboisii meningitis	0	0	.	.	.
115.9	Histoplasmosis meningitis	12	5	0.2	0	0.550615
130	Meningoencephalitis due to toxoplasmosis	0	0	.	.	.
293	Acute delirium	67	2	0.5	0	1
293.1	Subacute delirium	9	4	0.25	0	0.674352
320	Hemophilus meningitis	0	0	.	.	.
320.1	Pneumococcal meningitis	0	0	.	.	.
320.2	Streptococcal meningitis	1	0	.	.	.
320.3	Staphylococcal meningitis	0	0	.	.	.
320.7	Meningitis in oth bact dis	4	1	0	0	0
320.8	Bacterial meningitis nec	0	0	.	.	.
320.9	Bacterial meningitis nos	6	6	0	0	0
321	Cryptococcal meningitis	0	0	.	.	.
321.1	Meningitis in oth fungal dis	1	1	0	0	0
321.2	Meningitis in oth viral dis	0	0	.	.	.
321.3	Trypanosomiasis meningitis	2	1	0	0	0
321.8	Meningitis in oth nonbac dis	0	0	.	.	.
322	Nonpyogenic meningitis	18	5	0.2	0	0.550615
322.1	Eosinophilic meningitis	0	0	.	.	.
322.9	Meningitis nos	240	3	0.666667	0.133222	1
323	Encephalitis in viral diseases classified elsewhere	16	2	1	1	1
323.1	Encephalitis in rickettsial diseases classified elsewhere	0	0	.	.	.
323.2	Encephalitis in protozoal diseases classified elsewhere	18	12	0	0	0
323.4	Other encephalitis due to infection classified elsewhere	4	1	1	1	1
323.5	Encephalitis following immunization procedures	0	0	.	.	.
323.6	Postinfectious encephalitis	0	0	.	.	.
323.7	Toxic encephalitis	1	1	0	0	0
323.8	Other causes of encephalitis	0	0	.	.	.
323.9	Unspecified cause of encephalitis	204	5	0.2	0	0.550615
331.8	Reye's syndrome	8	2	0	0	0
348.3	Encephalopathy, unspecified	175	3	0.333333	0	0.866778
780	Coma and stupor	1603	47	0.0212766	0	0.0625327
780.3	Convulsions	653	19	0.526316	0.3018	0.750832
781.6	Meningismus	21	11	0.181818	0	0.409749
784	Headache	32290	683	0.557833	0.520586	0.59508
989.7	Aflatoxin and other mycotoxin (food contaminents)	1	1	0	0	0
998	Toxic effect of fish and shellfish (Saxitoxin)	10	3	0	0	0
Total		36342	874	0.52	0.48	0.55
*The Quebec provincial health care agency records ICD-9 diagnostic codes up to the first decimal position only. ICD-9 codes that are in the syndrome definition but do not appear in this table were not used in any of the 7,315,994 visits billed by the 1,098 participating physicians during the 2-year study period.
**Among the 7,315,994 visits to the 1,098 participating physicians during the 2-year study period.
***Among the 10,529 visits for which both the physician claim and the medical chart were available for verification.

## Sheet: RODS Rash
RASH SYNDROME, RODS definition
ICD-9 code in claims*	Text label for ICD-9 code	No. visits in claims**	No. visits in verified claims***	PPV	95% CI
					Lower limit	Upper limit
20.1	Cellulocutaneous plague	6	2	0	0	0
22	Cutaneous anthrax	9	6	0	0	0
34.1	Scarlet fever	2552	42	0.880952	0.783011	0.978894
40.8	Toxic shock syndrome	4	2	0.5	0	1
50	Variola major	3	3	0	0	0
50.1	Alastrim (Variola minor)	0	0	.	.	.
50.2	Modified smallpox	0	0	.	.	.
50.9	Smallpox, unspecified	2	2	0.5	0	1
51	Cowpox	3730	20	0	0	0
51.1	Pseudocowpox	42	0	.	.	.
51.2	Contagious pustular dermatitis	44	1	0	0	0
51.9	Paravaccinia, unspecified	30	1	1	1	1
52	Chickenpox	0	0	.	.	.
52.7	Chickenpox with other specified complications	0	0	.	.	.
52.8	Chickenpox with unspecified complication	0	0	.	.	.
52.9	Varicella without mention of complication	1558	26	0.884615	0.761809	1
53	Herpes zoster with meningitis	396	13	0.923077	0.778223	1
53.1	Herpes zoster with other nervous system complications	42	2	0.5	0	1
53.2	Herpes zoster with ophthalmic complications	229	4	1	1	1
53.7	Herpes zoster with other specified complications	19	6	1	1	1
53.8	Herpes zoster with unspecified complication	17	8	1	1	1
53.9	Herpes zoster without mention of complication	10551	168	0.886905	0.839013	0.934797
54	Eczema herpeticum	708	13	0.461538	0.190541	0.732536
54.4	Herpes simplex with ophthalmic complications	7	5	0.4	0	0.829414
54.7	Herpes simplex with other specified complications	16	8	0.875	0.645823	1
54.8	Herpes simplex with unspecified complication	5	4	0.5	0.01	0.99
54.9	Herpes simplex without mention of complication	8763	153	0.647059	0.571335	0.722783
55	Measles	10	1	0	0	0
55.7	Measles with other specified complications	0	0	.	.	.
55.8	Measles with unspecified complication	141	4	0	0	0
55.9	Measles without mention of complication	82	3	0.333333	0	0.866778
56	Rubella	4	4	0.5	0.01	0.99
56.7	Rubella with other specified complications	2	1	0	0	0
56.8	Rubella with unspecified complications	0	0	.	.	.
56.9	Rubella without mention of complication	172	1	0	0	0
57	Erythema infectiosum [fifth disease]	238	2	1	1	1
57.8	Other specified viral exanthemata	619	9	0.555556	0.230912	0.880199
57.9	Viral exanthem, unspecified	1440	15	0.333333	0.0947697	0.571897
74.3	Hand, foot mouth dis	49	1	1	1	1
80	Louse-borne (epidemic) typhus	0	0	.	.	.
81	Murine (endemic) typhus	3	1	0	0	0
81.9	Typhus, unspecified	0	0	.	.	.
82	Spotted fevers (Rocky mountain spotted fever)	2	2	0.5	0	1
82.1	Boutonneuse fever	14	2	0	0	0
82.2	North asian tick fever	2	1	0	0	0
82.3	Queensland tick typhus	3	2	0	0	0
82.8	Tick-borne ricketts nec	4	1	1	1	1
82.9	Tick-borne ricketts nos	9	4	0	0	0
83.2	Rickettsialpox	2	2	0	0	0
83.8	Rickettsioses nec	2	1	0	0	0
83.9	Rickettsiosis nos	2	1	0	0	0
91.3	Secondary syphilis skin	48	0	.	.	.
115.1	Infection by Histoplasma duboisii	0	0	.	.	.
287	Allergic purpura	66	2	1	1	1
287.1	Qualitative platelet defects	56	2	0	0	0
287.2	Other nonthrombocytopenic purpuras	389	11	0.363636	0.0793565	0.647916
287.8	Other specified hemorrhagic conditions	2	2	0	0	0
287.9	Unspecified hemorrhagic conditions	394	11	0.181818	0	0.409749
684	Impetigo	0	0	.	.	.
686	Pyoderma	752	13	0.153846	0	0.34998
686.1	Pyogenic granuloma	433	6	0	0	0
694.3	Impetigo herpetiformis	4	3	0	0	0
695	Toxic erythema	53	3	0.666667	0.133222	1
695.1	Erythema multiforme	106	1	1	1	1
695.2	Erythema nodosum	135	5	1	1	1
695.8	Other specified erythematous conditions	735	12	0.666667	0.399944	0.933389
695.9	Unspecified erythematous condition	3183	41	0.292683	0.153409	0.431957
782.1	Rash and other nonspecific skin eruption	16123	131	0.694656	0.615789	0.773524
782.7	Spontaneous ecchymoses	1239	24	0.333333	0.144732	0.521934
Total		55251	814	0.63	0.59	0.66
*The Quebec provincial health care agency records ICD-9 diagnostic codes up to the first decimal position only. ICD-9 codes that are in the syndrome definition but do not appear in this table were not used in any of the 7,315,994 visits billed by the 1,098 participating physicians during the 2-year study period.
**Among the 7,315,994 visits to the 1,098 participating physicians during the 2-year study period.
***Among the 10,529 visits for which both the physician claim and the medical chart were available for verification.

## Sheet: RODS Resp
RESPIRATORY SYNDROME, RODS definition
ICD-9 code in claims*	Text label for ICD-9 code	No. visits in claims**	No. visits in verified claims***	PPV	95% CI
					Lower limit	Upper limit
3.2	Salmonella pneumonia	3	1	0	0	0
10	Primary tuberculous infection	2	1	1	1	1
10.1	Tuberculous pleurisy in primary progressive tuberculosis	3	2	0.5	0	1
10.8	Other primary progressive tuberculosis	1	1	0	0	0
10.9	Primary tuberculous infection, unspecified type	16	6	0.333333	0	0.710536
11	Tuberculosis of lung, infiltrative	29	8	0.375	0.0395199	0.71048
11.1	Tuberculosis of lung, nodular	20	8	0.125	0	0.354177
11.2	Tuberculosis of lung with cavitation	32	0	.	.	.
11.3	Tuberculosis of bronchus	171	0	.	.	.
11.4	Tuberculous fibrosis of lung	2	1	0	0	0
11.5	Tuberculous bronchiectasis of lung	1	1	1	1	1
11.6	Tuberculous pneumonia (any form) of lung	2	1	0	0	0
11.7	Tuberculous pneumothorax of lung	7	2	0	0	0
11.8	Other specified pulmonary tuberculosis	4	0	.	.	.
11.9	Unspecified pulmonary tuberculosis	259	1	0	0	0
20	Plague	1	1	1	1	1
20.3	Primary pneumonic plague	0	0	.	.	.
20.4	Secondary pneumonic plague	7	3	0.333333	0	0.866778
20.5	Pneumonic plague, unspecified	0	0	.	.	.
21.2	Pulmonary tularemia	0	0	.	.	.
22	Anthrax	9	6	0	0	0
22.1	Pulmonary anthrax	0	0	.	.	.
24	Glanders	0	0	.	.	.
25	Melioidosis	0	0	.	.	.
32	Faucial diphtheria	52	0	.	.	.
32.1	Nasopharyngeal diphtheria	8	5	0.4	0	0.829414
32.2	Anterior nasal diphtheria	7	2	0	0	0
32.3	Laryngeal diphtheria	1	0	.	.	.
32.8	Other specified diphtheria	0	0	.	.	.
32.9	Diphtheria, unspecified	2	2	0.5	0	1
33	Bordetella pertussis	39	9	1	1	1
33.1	Bordetella parapertussis	0	0	.	.	.
33.8	Whooping cough nec	5	1	1	1	1
33.9	Whooping cough nos	325	0	.	.	.
34	Strep sore throat	735	2	1	1	1
52.1	Varicella (hemorrhagic) pneumonitis	0	0	.	.	.
55.1	Postmeasles pneumonia	8	3	0.666667	0.133222	1
73	Ornithosis (Psittacoisis)	0	0	.	.	.
74.1	Epidemic pleurodynia	7	1	1	1	1
79	Adenovirus infection in conditions classified elsewhere and of unspecified site	507	0	.	.	.
79.3	Rhinovirus infection in conditions classified elsewhere and of unspecified site	2	1	0	0	0
79.6	Resp syncytial virus (rsv) infection in conditions classified elsewhere and of unspecified site	0	0	.	.	.
79.8	Viral infection nec	154	4	0	0	0
83	Q fever	56	0	.	.	.
112.4	Candidiasis of lung	3	1	0	0	0
114	Primary coccidioidomycosis (pulmonary)	0	0	.	.	.
114.9	Coccidioidomycosis nos	2	1	0	0	0
115	Infection by Histoplasma capsulatum	1	1	0	0	0
115.1	Infection by Histoplasma duboisii	0	0	.	.	.
115.9	Histoplasmosis, unspecified	12	5	0.2	0	0.550615
130.4	Pneumonitis due to toxoplasmosis	0	0	.	.	.
136.3	Pneumocystosis	1	0	.	.	.
460	Acute nasopharyngitis [common cold]	1	0	.	.	.
462	Acute pharyngitis	10	0	.	.	.
463	Acute tonsillitis	3	0	.	.	.
464	Acute laryngitis	12319	27	0.740741	0.57544	0.906041
464.1	Acute tracheitis	9716	13	0.769231	0.540196	0.998266
464.2	Acute laryngotracheitis	1214	1	1	1	1
464.3	Acute epiglottitis	32	16	0.6875	0.460379	0.914621
464.4	Croup	916	0	.	.	.
465	Acute laryngopharyngitis	4679	3	0.666667	0.133222	1
465.8	Acute upper Resp infections of other multiple sites	3809	11	0.636364	0.352084	0.920643
465.9	Acute upper Resp infections of unspecified site	223128	84	0.785714	0.697965	0.873464
466	Acute bronchitis	62662	67	0.80597	0.711278	0.900662
466.1	Acute bronchiolitis	5006	10	0.9	0.714058	1
480	Pneumonia due to adenovirus	636	2	0	0	0
480.1	Pneumonia due to Resp syncytial virus	3	3	0.333333	0	0.866778
480.2	Pneumonia due to parainfluenza virus	1	0	.	.	.
480.8	Pneumonia due to other virus not elsewhere classified	1	1	1	1	1
480.9	Viral pneumonia, unspecified	1044	0	.	.	.
481	Pneumococcal pneumonia [Streptococcus pneumoniae pneumonia]	0	0	.	.	.
482	Pneumonia due to Klebsiella pneumoniae	311	0	.	.	.
482.1	Pneumonia due to Pseudomonas	26	6	0.333333	0	0.710536
482.2	Pneumonia due to Hemophilus influenzae [H. influenzae]	8	4	1	1	1
482.3	Pneumonia due to Streptococcus	0	0	.	.	.
482.4	Pneumonia due to Staphylococcus	0	0	.	.	.
482.8	Pneumonia due to other specified bacteria	25	4	1	1	1
482.9	Bacterial pneumonia, unspecified	2915	2	0.5	0	1
483	Pneumonia due to Mycoplasma pneumoniae	0	0	.	.	.
483.1	Pneumonia due to Chlamydia	0	0	.	.	.
483.8	Pneumonia due to other specified organism	0	0	.	.	.
484	Pneumonia in infectious diseases classified elsewhere	6	3	0.333333	0	0.866778
484.1	Pneumonia in cytomegalic inclusion disease	10	4	0.5	0.01	0.99
484.3	Pneumonia in whooping cough	0	0	.	.	.
484.5	Pneumonia in anthrax	1	1	0	0	0
484.6	Pneumonia in aspergillosis	0	0	.	.	.
484.7	Pneumonia in other systemic mycoses	0	0	.	.	.
484.8	Pneumonia in other infectious diseases classified elsewhere	1	1	0	0	0
485	Bronchopneumonia, organism unspecified	0	0	.	.	.
486	Pneumonia, organism unspecified	1	1	1	1	1
487	Influenza with pneumonia	278	1	1	1	1
487.1	Influenza with other Resp manifestations	28029	41	0.756098	0.624647	0.887548
490	Bronchitis nos	2	1	0	0	0
491	Chronic bronchitis	1452	0	.	.	.
491.1	Mucopurulent chronic bronchitis	90	0	.	.	.
491.2	Obstructive chronic bronchitis	578	1	0	0	0
491.8	Chronic bronchitis nec	795	3	0.666667	0.133222	1
491.9	Chronic bronchitis nos	8098	16	0.4375	0.194422	0.680578
507	Pneumonitis due to solids and liquids	24	11	0.454545	0.160288	0.748803
507.1	Pneumonitis due to inhalation of oils and essences	0	0	.	.	.
507.8	Pneumonitis due to other solids and liquids	0	0	.	.	.
511	Pleurisy	139	0	.	.	.
511.1	Bact pleur/effus not tb	0	0	.	.	.
511.8	Pleural effus nec not tb	9	6	0.666667	0.289464	1
511.9	Pleural effusion nos	366	2	1	1	1
513	Abscess of lung	21	7	0.714286	0.379622	1
513.1	Abscess of mediastinum	1	1	0	0	0
518	Pulmonary collapse	143	2	0.5	0	1
518.4	Acute lung edema nos	246	1	0	0	0
518.8	Other diseases of lung	2572	11	0.363636	0.0793565	0.647916
519.2	Mediastinitis	7	3	0.333333	0	0.866778
784.1	Throat pain	3061	6	1	1	1
786	Dyspnea/Resp abn	24392	69	0.275362	0.169961	0.380763
786.1	Stridor	54	0	.	.	.
786.2	Cough	43291	69	0.84058	0.754204	0.926956
786.5	Painful respiration	33582	67	0.671642	0.559191	0.784092
795.3	Nonspecific positive findings for anthrax (Positive findings by nasal swab)	3	1	0	0	0
V018	Contact or exposure to anthrax (Other communicable diseases)	2	1	0	0	0
Total		478215	665	0.74	0.7	0.79
*The Quebec provincial health care agency records ICD-9 diagnostic codes up to the first decimal position only. ICD-9 codes that are in the syndrome definition but do not appear in this table were not used in any of the 7,315,994 visits billed by the 1,098 participating physicians during the 2-year study period.
**Among the 7,315,994 visits to the 1,098 participating physicians during the 2-year study period.
***Among the 10,529 visits for which both the physician claim and the medical chart were available for verification.

[truncated: 2 more sheets: ILI Large, ILI Small]
